# Supplementary material for: Modulating the band gap of a pyrazinoquinoxaline-based metal–organic framework through orbital hybridization for enhanced visible light-driven CN bond construction
Source: Royal Society of Chemistry journal article supplement (doi:10.1039/d4ta06282e), 2024-01-01

## Supporting Information

### **Modulating the band gap of pyrazinoquinoxaline-based metal-organic framework through orbital hybridization for enhanced visible light-driven C=N bond construction**

Zitong Chen<sup>†b</sup>, Linghui Cao<sup>†b</sup>, Aogang Liu<sup>b</sup>, Pengda Liu<sup>b</sup>, Yuan Chen<sup>\*b</sup>, Juntao Yan<sup>\*a</sup>,  
Bao Li<sup>\*a, b</sup>

<sup>a</sup>College of Chemistry and Environmental Engineering, Wuhan Polytechnic University, Wuhan 430023, China; Email: yanjuntaonihao@163.com.

<sup>b</sup>Key Laboratory of Material Chemistry for Energy Conversion and Storage, Semiconductor Chemistry Center, School of Chemistry and Chemical Engineering, Hubei Key Laboratory of Bioinorganic Chemistry & Materia Medica, Huazhong University of Science and Technology, Wuhan, Hubei 430074, People's Republic of China; Email: chenyan122800@163.com; libao@hust.edu.cn.

## Table of Contents

|                                                    |    |
|----------------------------------------------------|----|
| <b>Materials and reagents</b> .....                | 1  |
| <b>Characterization and methods</b> .....          | 1  |
| <b>Synthesis of H<sub>4</sub>PQTB</b> .....        | 3  |
| <b>Preparation of In-PQTB</b> .....                | 4  |
| <b>Supporting figures and tables</b> .....         | 5  |
| <b>Investigation of reaction mechanism</b> .....   | 12 |
| <b>Evaluation of catalytic performance</b> .....   | 13 |
| <b>Characterization of products</b> .....          | 14 |
| <b>References</b> .....                            | 16 |
| <b><sup>1</sup>H NMR spectra of products</b> ..... | 17 |

## Materials and reagents

All the reagents and solvents were purchased commercially and directly used without further purification. Vitamin B<sub>1</sub> hydrochloride was provided by Shanghai Macklin Biochemical Technology Co., Ltd. Methyl 4-formylbenzoate, anhydrous indium (III) chloride (InCl<sub>3</sub>), hydrobromic acid and 1,2,4,5-benzenetetramine tetrahydrochloride were obtained from Heowns Biochem Technologies, LLC, Tianjin. Sodium hydroxide (NaOH), hydrochloric acid (HCl) and triethylamine were acquired from Sinopharm Chemical Reagent Co., Ltd. Acetic acid and all the solvents were supplied by Shanghai Titan Scientific Co., Ltd. All the reagents for photocatalysis experiments were provided by the above-mentioned suppliers as well. Spin trapping agent 5,5-dimethyl-1-pyrroline N-oxide (DMPO) was obtained from Dojindo Laboratories.

## Characterization and methods

The crystal structure of In-PQTB was obtained via Single-Crystal X-ray diffraction (SCXRD). Diffraction data for In-PQTB were collected via Bruker Venture at 100 K (Cu-K $\alpha$ ,  $\lambda = 1.54178 \text{ \AA}$ ). The structure of In-PQTB was directly solved, and the non-hydrogen atoms were located from the trial structure and then refined anisotropically with SHELXTL using a full-matrix least squares procedure based on  $F^2$  values. The hydrogen atom positions were fixed geometrically at calculated distances and allowed to ride on the parent atoms. Attempts to define the highly disordered solvent molecules were unsuccessful, thus the structure was refined with the PLATON “SQUEEZE” procedure. Supplementary crystallographic data and data under different temperatures for this paper can be obtained free of charge from CCDC-2358840 in Cambridge Crystallographic Data Centre via <http://www.ccdc.cam.ac.uk/datarequest/cif>.

The crystal and chemical structures of the samples were verified by X-ray diffraction (XRD, SmartLab-SE, Cu-K $\alpha$ ) and Fourier transform infrared spectroscopy (FT-IR, VERTEX 70, KBr pellet method). The thermostability of the samples were assessed by thermogravimetry (TG, Diamond TG/DTA) from room temperature to 800°C with a heating rate of 10°C/min under N<sub>2</sub> atmosphere. The light adsorption capacity of the samples was evaluated through solid-state ultraviolet-visible diffuse reflectance

spectroscopy (UV-vis-DRS, UV-3600, BaSO<sub>4</sub> as reference). The fluorescence spectra of the samples were obtained by RF-6000. Electron paramagnetic resonance (EPR, EMXmicro-6/1/P/L) was conducted to verify the formation of reactive oxygen species through irradiation of the samples. Nuclear magnetic resonance (NMR, Avance III, 400MHz) was employed to analyze the photocatalysis results. The morphology and element composition of the samples were identified by scanning electron microscopy/energy dispersive spectroscopy (SEM/EDS, Hitachi S-4800) and X-ray photoelectron spectroscopy (XPS, Thermo escalab 250XI). By-products and intermediates of the reactions were detected with mass spectrum (MS, microTOF II). The photoelectric properties of the samples were assessed by electrochemical tests on the electrochemical workstation (CHI-760E, Shanghai Chenhua Instrument Co., Ltd.). A three-electrode system were applied, with the Ag/AgCl (saturated KCl) electrode as the reference electrode, a platinum foil as the counter electrode. To assemble the working electrode, 2 mg of the samples were dispersed into 25  $\mu$ L of Nafion (5%) and 475  $\mu$ L of ethanol absolute. After thorough ultrasonication of the suspension, 200  $\mu$ L of the mixture was carefully let to drip dropwise on an area of 1 cm  $\times$  1 cm on an indium tin oxide (ITO) conductive glass. After dried at 50°C for 4 h, it was applied as the working electrode. Na<sub>2</sub>SO<sub>4</sub> aqueous solution (1 mol/L) was employed as the electrolyte solution. The photocurrent was recorded at open circuit potential (OCP). The electrochemical impedance spectroscopy (EIS) was conducted in the frequency range of 10<sup>-2</sup>~10<sup>5</sup> Hz with an amplitude of 5 mV at OCP. The Mott-Schottky curves were obtained from impedance-potential functions measured in the range of (OCP  $\pm$  1 V) with an amplitude of 5 mV and an increment of 20 mV.

Theoretical calculations were carried out based on previous reports. The structures of intermediates were optimized by Dmol<sup>3</sup> module, following by the frequency calculation to obtain zero-point vibration energy and Gibbs free energy. The generalized gradient approximation (GGA) with the Perdew-Burke-Ernzerhof (PBE, Phys. Rev. Lett. 1996, 77, 3865) function was employed. The convergence tolerance of energy, force and displacement convergence were set as 1 $\times$ 10<sup>-5</sup> Ha, 2 $\times$ 10<sup>-3</sup> Ha and 5 $\times$ 10<sup>-3</sup> Å, respectively.

The core treatment and the electron treatment were performed by effective core potential (ECP) and double numerical plus d-functions (DNP) basis set, respectively.

## Synthesis of H<sub>4</sub>PQTB

The ligand H<sub>4</sub>PQTB was synthesized based on the literature<sup>1-4</sup>. The synthetic route is shown in Scheme S1.

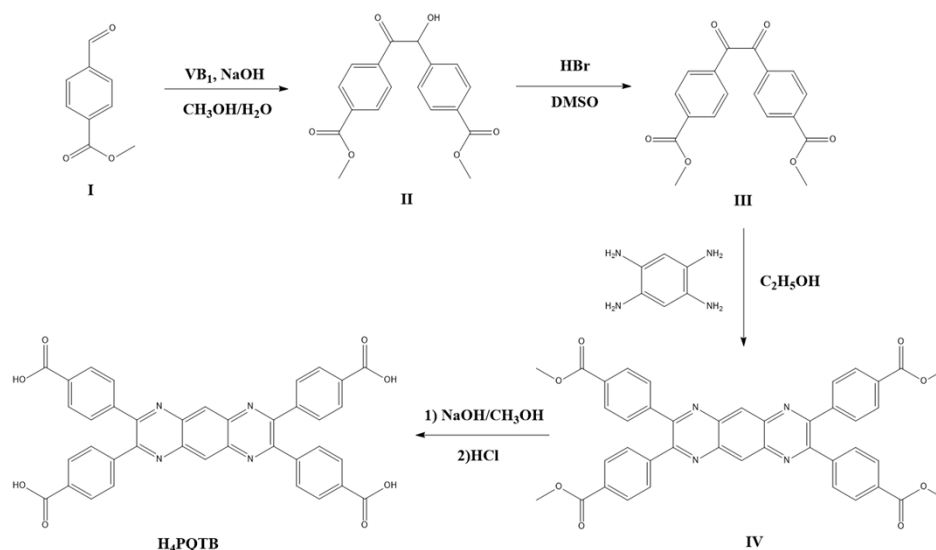

Scheme S1 Synthetic route of H<sub>4</sub>PQTB.

### Synthesis of II

Vitamin B<sub>1</sub> hydrochloride (VB<sub>1</sub>, C<sub>12</sub>H<sub>17</sub>ClN<sub>4</sub>OS·HCl, 337.27 g/mol, 5.35 mmol, 1.80 g) was dissolved into a mixed solution (H<sub>2</sub>O:CH<sub>3</sub>OH = 15 mL:45 mL). The mixture was cooled under ice bath and 5 mL of NaOH aqueous solution (2 mol/L) was slowly added under stirring. After stirring for 10 min, the ice bath was removed to recover room temperature. Then, methyl 4-formylbenzoate (**I**, C<sub>9</sub>H<sub>8</sub>O<sub>3</sub>, 164.16 g/mol, 91 mmol, 14.9 g) was added. The mixture was heated to reflux at 80°C for 6 h. White solid **II** was obtained after filtered, washed with distilled water and methanol in turn and dried at 70°C overnight.

### Synthesis of III

**II** (C<sub>18</sub>H<sub>16</sub>O<sub>6</sub>, 328.32 g/mol, 22.5 mmol, 7.4 g) was dissolved into dimethyl sulfoxide (DMSO, 51 mL), then 10.5 mL of hydrobromic acid (HBr, 48%) was slowly added. The mixture was heated to 70°C and kept for 24 h, then it was poured into abundant

distilled water. After filtered, washed with distilled water and dried at 70°C overnight, yellow solid **III** was obtained.

### *Synthesis of IV*

**III** ( $C_{18}H_{14}O_6$ , 326.30 g/mol, 7.20 mmol, 2.35 g) and 1,2,4,5-benzenetetramine tetrahydrochloride ( $C_6H_{10}N_4 \cdot 4HCl$ , 284.01 g/mol, 3.53 mmol, 1.00 g) were dissolved into 100 mL of absolute ethanol. Then, 0.5 mL of triethylamine (TEA) was added under stirring. After stirring for 5 min, 1.0 mL of acetic acid was added. The mixture was heated to reflux at 80°C for 24 h. Green precipitate **IV** was obtained after filtered, washed with absolute ethanol and dried at 70°C overnight.

### *Synthesis of H<sub>4</sub>PQTB*

**IV** ( $C_{42}H_{30}N_4O_8$ , 718.72 g/mol, 2 g) and NaOH (4 g) was dissolved into 100 mL of methanol. The mixture was heated to reflux at 70 °C for 24 h. After evaporation, abundant distilled water was added to dissolve the solid. The precipitate was generated by adding HCl to adjust the pH of the solution to 3. The mixture was filtered, washed with distilled water and dried at 70°C overnight to yield brown solid **H<sub>4</sub>PQTB**.

### **Preparation of In-PQTB**

In-PQTB was synthesized through a typical solvothermal method. Initially, 10 mg of  $InCl_3$  was dissolved into 3 mL of N, N-dimethylacetamide (DMF). Then, the solution was added into a Pyrex vial (5 mL) after 20 mg of **H<sub>4</sub>PQTB**. The vessel was sealed with tinfoil and the mixture was treated with ultrasonication. The vial was heated to 120°C and kept for 72 h. Olive-shaped dark crystals were obtained after centrifugation. The solid was washed with DMF and dried at room temperature with filter papers.

## Supporting figures and tables

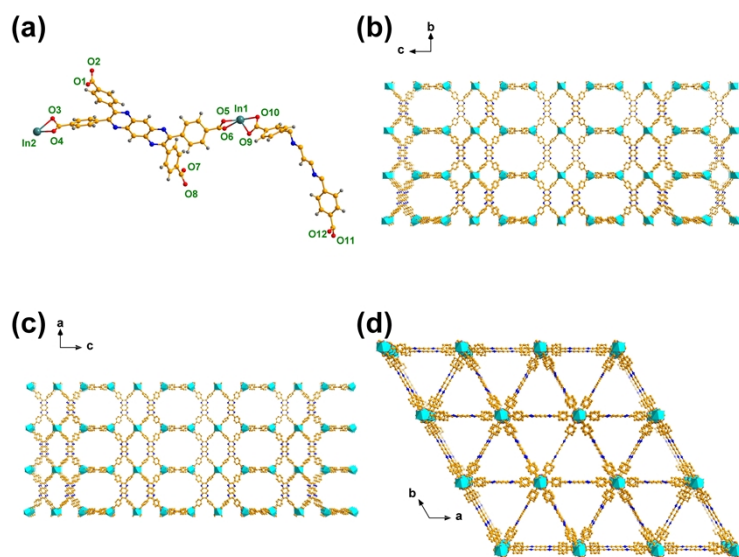

Figure S1 (a) Asymmetric unit of In-PQTB; (b-d) partial perspective view of the 3D packing structure of In-PQTB along *a*-axis, *b*-axis and *c*-axis, respectively.

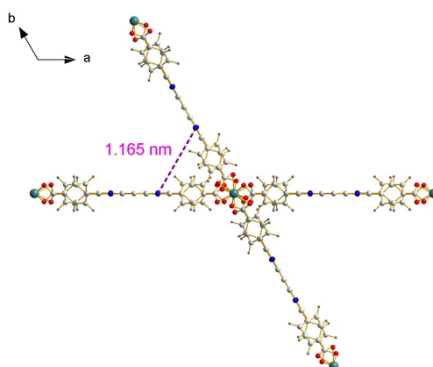

Figure S2 Distance between adjacent pyrazinoquinoxaline rings.

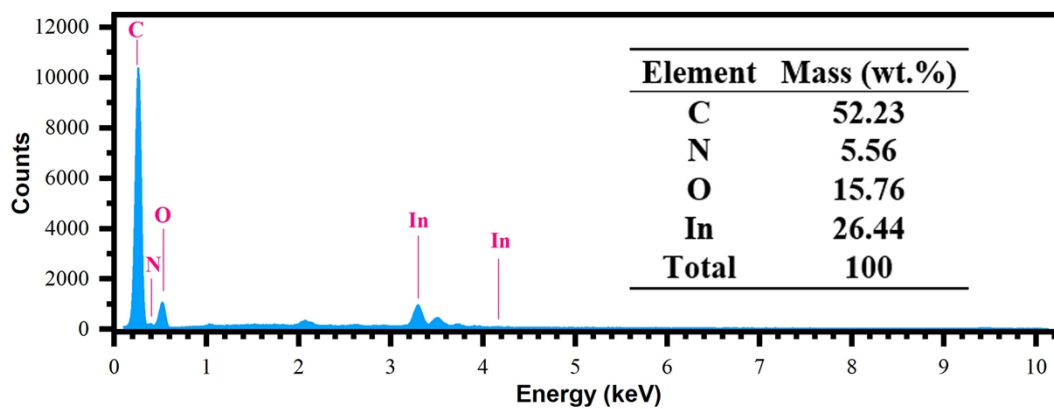

Figure S3 EDS image of In-PQTB.

Table S1. Crystal data of In-PQTB.

| In-PQTB                                       |                                                                |
|-----------------------------------------------|----------------------------------------------------------------|
| Empirical formula                             | $C_{114}H_{54}In_{2.05}N_{12}O_{24}$                           |
| Formula weight                                | 2211.49                                                        |
| Temperature/K                                 | 173(2)                                                         |
| Crystal system                                | trigonal                                                       |
| Space group                                   | P-3                                                            |
| $a/\text{\AA}$                                | 20.318(4)                                                      |
| $b/\text{\AA}$                                | 20.318(4)                                                      |
| $c/\text{\AA}$                                | 34.047(11)                                                     |
| $\alpha/^\circ$                               | 90                                                             |
| $\beta/^\circ$                                | 90                                                             |
| $\gamma/^\circ$                               | 120                                                            |
| Volume/ $\text{\AA}^3$                        | 12173(7)                                                       |
| Z                                             | 1                                                              |
| $\rho_{\text{calc}}/\text{g/cm}^3$            | 0.302                                                          |
| $\mu/\text{mm}^{-1}$                          | 0.097                                                          |
| F(000)                                        | 1115.0                                                         |
| Crystal size/ $\text{mm}^3$                   | $0.2 \times 0.1 \times 0.1$                                    |
| Radiation                                     | synchrotron ( $\lambda = 0.67012$ )                            |
| $2\theta$ range for data collection/ $^\circ$ | 2.456 to 44.16                                                 |
| Index ranges                                  | $-22 \leq h \leq 22, -22 \leq k \leq 22, -38 \leq l \leq 37$   |
| Reflections collected                         | 114238                                                         |
| Independent reflections                       | 11784 [ $R_{\text{int}} = 0.1533, R_{\text{sigma}} = 0.0806$ ] |
| Data/restraints/parameters                    | 11784/863/575                                                  |
| Goodness-of-fit on $F^2$                      | 1.156                                                          |
| Final $R$ indexes [ $I \geq 2\sigma(I)$ ]     | $R_1 = 0.1832, wR_2 = 0.4204$                                  |
| Final $R$ indexes [all data]                  | $R_1 = 0.2225, wR_2 = 0.4399$                                  |
| Largest diff. peak/hole / $e \text{\AA}^{-3}$ | 1.60/-0.67                                                     |

Table S2. Bond lengths of In-PQTB.

| Atom | Atom  | Length/ $\text{\AA}$ | Atom | Atom | Length/ $\text{\AA}$ |
|------|-------|----------------------|------|------|----------------------|
| In2  | C36   | 2.582(15)            | C42  | C43  | 1.3900               |
| In2  | O3    | 2.309(19)            | C43  | C44  | 1.3900               |
| In2  | O4    | 2.34(2)              | C43  | C46  | 1.497(7)             |
| In1  | C46   | 2.580(12)            | C44  | C45  | 1.3900               |
| In1  | O5    | 2.221(9)             | C46  | O5   | 1.265(9)             |
| In1  | O6    | 2.259(9)             | C46  | O6   | 1.263(9)             |
| In1  | C56_1 | 2.656(14)            | C50  | C51  | 1.3900               |



|     |      |           |       |       |           |
|-----|------|-----------|-------|-------|-----------|
| In1 | O8_1 | 2.279(10) | C50   | C55   | 1.3900    |
| In1 | O7_1 | 2.285(10) | C50   | C12   | 1.488(10) |
| N1  | C2   | 1.3900    | C51   | C52   | 1.3900    |
| N1  | C6   | 1.3900    | C52   | C53   | 1.3900    |
| C2  | C3   | 1.3900    | C53   | C54   | 1.3900    |
| C2  | C30  | 1.492(9)  | C53   | C56   | 1.493(7)  |
| C3  | N4   | 1.3900    | C54   | C55   | 1.3900    |
| C3  | C21  | 1.478(9)  | C56   | O7    | 1.248(9)  |
| N4  | C5   | 1.3900    | C56   | O8    | 1.267(9)  |
| C5  | C6   | 1.3900    | N3    | C12   | 1.384(4)  |
| C5  | C10  | 1.3900    | C11   | C12   | 1.376(8)  |
| C6  | C7   | 1.3900    | C11   | N2    | 1.391(7)  |
| C7  | C8   | 1.3900    | O3_1  | C36_1 | 1.287(10) |
| C8  | C9   | 1.3900    | C36_1 | O4_1  | 1.295(11) |
| C8  | N3   | 1.387(4)  | C36_1 | C33_1 | 1.526(11) |
| C9  | C10  | 1.3900    | C33_1 | C32_1 | 1.394(5)  |
| C9  | N2   | 1.386(6)  | C33_1 | C34_1 | 1.392(5)  |
| C21 | C22  | 1.3900    | C32_1 | C31_1 | 1.393(5)  |
| C21 | C26  | 1.3900    | C31_1 | C30_1 | 1.392(5)  |
| C22 | C23  | 1.3900    | C30_1 | C35_1 | 1.393(5)  |
| C23 | C24  | 1.3900    | C30_1 | C2_1  | 1.499(10) |
| C24 | C25  | 1.3900    | C35_1 | C34_1 | 1.391(5)  |
| C24 | C27  | 1.494(7)  | C2_1  | N1_1  | 1.3899(3) |
| C25 | C26  | 1.3900    | N1_1  | C6_1  | 1.3895(2) |
| C27 | O1   | 1.228(8)  | C6_1  | C7_1  | 1.3924(3) |
| C27 | O2   | 1.287(8)  | C7_1  | C8_1  | 1.3900(2) |
| C30 | C31  | 1.3900    | C8_1  | N3_1  | 1.3854(3) |
| C30 | C35  | 1.3900    | N3_1  | C12_1 | 1.3868(3) |
| C31 | C32  | 1.3900    | C12_1 | C50_1 | 1.499(10) |
| C32 | C33  | 1.3900    | C50_1 | C55_1 | 1.396(5)  |
| C33 | C34  | 1.3900    | C50_1 | C51_1 | 1.395(5)  |
| C33 | C36  | 1.525(9)  | C55_1 | C54_1 | 1.393(5)  |
| C34 | C35  | 1.3900    | C54_1 | C53_1 | 1.394(5)  |
| C36 | O3   | 1.287(9)  | C53_1 | C52_1 | 1.393(5)  |
| C36 | O4   | 1.294(9)  | C53_1 | C56_1 | 1.487(8)  |
| C40 | C41  | 1.3900    | C52_1 | C51_1 | 1.394(5)  |
| C40 | C45  | 1.3900    | C56_1 | O8_1  | 1.265(10) |
| C40 | C11  | 1.486(8)  | C56_1 | O7_1  | 1.248(10) |

Table S3. Bond angles of In-PQTB.

| Atom | Atom | Atom  | Angle/°   | Atom | Atom | Atom | Angle/°   |
|------|------|-------|-----------|------|------|------|-----------|
| O3   | In2  | C36   | 29.8(3)   | C44  | C43  | C46  | 119.8(4)  |
| O3   | In2  | O4    | 55.5(4)   | C45  | C44  | C43  | 120.0     |
| O4   | In2  | C36   | 30.0(3)   | C44  | C45  | C40  | 120.0     |
| C46  | In1  | C56_1 | 120.3(12) | C43  | C46  | In1  | 170.0(11) |
| O5   | In1  | C46   | 29.4(2)   | O5   | C46  | In1  | 59.4(5)   |
| O5   | In1  | O6    | 58.2(3)   | O5   | C46  | C43  | 117.5(8)  |
| O5   | In1  | C56_1 | 105.8(12) | O6   | C46  | In1  | 61.1(5)   |
| O5   | In1  | O8_1  | 121.2(16) | O6   | C46  | C43  | 118.6(9)  |
| O5   | In1  | O7_1  | 93.0(15)  | O6   | C46  | O5   | 119.0(11) |
| O6   | In1  | C46   | 29.3(2)   | C46  | O5   | In1  | 91.3(6)   |
| O6   | In1  | C56_1 | 134.3(10) | C46  | O6   | In1  | 89.5(6)   |
| O6   | In1  | O8_1  | 162.0(11) | C51  | C50  | C55  | 120.0     |
| O6   | In1  | O7_1  | 106.3(10) | C51  | C50  | C12  | 119.9(4)  |
| O8_1 | In1  | C46   | 144.9(14) | C55  | C50  | C12  | 120.1(4)  |
| O8_1 | In1  | C56_1 | 28.4(3)   | C52  | C51  | C50  | 120.0     |
| O8_1 | In1  | O7_1  | 56.0(4)   | C53  | C52  | C51  | 120.0     |
| O7_1 | In1  | C46   | 97.2(13)  | C52  | C53  | C54  | 120.0     |
| O7_1 | In1  | C56_1 | 28.0(3)   | C52  | C53  | C56  | 119.6(4)  |
| N1   | C2   | C3    | 120.0     | C54  | C53  | C56  | 120.4(4)  |
| N1   | C2   | C30   | 113.3(4)  | C55  | C54  | C53  | 120.0     |
| C3   | C2   | C30   | 126.1(5)  | C54  | C55  | C50  | 120.0     |
| C2   | C3   | C21   | 130.6(12) | O7   | C56  | C53  | 120.4(8)  |
| N4   | C3   | C2    | 120.0     | O7   | C56  | O8   | 119.2(9)  |
| N4   | C3   | C21   | 108.8(13) | O8   | C56  | C53  | 118.0(8)  |
| C5   | N4   | C3    | 120.0     | C12  | N3   | C8   | 116.6(6)  |
| N4   | C5   | C6    | 120.0     | C12  | C11  | C40  | 124.6(6)  |
| C5   | C6   | N1    | 120.0     | C12  | C11  | N2   | 121.3(5)  |
| C7   | C6   | N1    | 120.0     | N2   | C11  | C40  | 112.2(6)  |
| C7   | C6   | C5    | 120.0     | N3   | C12  | C50  | 106.6(5)  |
| C6   | C7   | C8    | 120.0     | C11  | C12  | C50  | 130.4(6)  |
| C7   | C8   | C9    | 120.0     | C11  | C12  | N3   | 122.4(5)  |
| N3   | C8   | C7    | 118.7(4)  | C9   | N2   | C11  | 116.7(7)  |
| N3   | C8   | C9    | 121.3(4)  | C36  | O3   | In2  | 86.9(11)  |
| C10  | C9   | C8    | 120.0     | C36  | O4   | In2  | 85.4(11)  |

|     |     |     |           |       |       |       |             |
|-----|-----|-----|-----------|-------|-------|-------|-------------|
| N2  | C9  | C8  | 121.8(5)  | O3_1  | C36_1 | O4_1  | 112.7(13)   |
| N2  | C9  | C10 | 118.2(5)  | O3_1  | C36_1 | C33_1 | 126.7(16)   |
| C9  | C10 | C5  | 120.0     | O4_1  | C36_1 | C33_1 | 113.7(15)   |
| C22 | C21 | C3  | 109.4(19) | C32_1 | C33_1 | C36_1 | 111.7(13)   |
| C22 | C21 | C26 | 120.0     | C34_1 | C33_1 | C36_1 | 128.2(16)   |
| C26 | C21 | C3  | 130.6(19) | C34_1 | C33_1 | C32_1 | 118.9(6)    |
| C23 | C22 | C21 | 120.0     | C31_1 | C32_1 | C33_1 | 119.8(8)    |
| C22 | C23 | C24 | 120.0     | C30_1 | C31_1 | C32_1 | 119.2(9)    |
| C23 | C24 | C25 | 120.0     | C31_1 | C30_1 | C35_1 | 118.3(9)    |
| C23 | C24 | C27 | 119.6(4)  | C31_1 | C30_1 | C2_1  | 120.4(7)    |
| C25 | C24 | C27 | 120.4(4)  | C35_1 | C30_1 | C2_1  | 119.8(6)    |
| C26 | C25 | C24 | 120.0     | C34_1 | C35_1 | C30_1 | 120.0(7)    |
| C25 | C26 | C21 | 120.0     | C35_1 | C34_1 | C33_1 | 120.4(7)    |
| O1  | C27 | C24 | 123.0(8)  | N1_1  | C2_1  | C30_1 | 111.0(7)    |
| O1  | C27 | O2  | 121.2(8)  | C6_1  | N1_1  | C2_1  | 119.978(18) |
| O2  | C27 | C24 | 115.7(6)  | N1_1  | C6_1  | C7_1  | 120.031(18) |
| C31 | C30 | C2  | 119.9(4)  | C8_1  | C7_1  | C6_1  | 120.053(18) |
| C31 | C30 | C35 | 120.0     | N3_1  | C8_1  | C7_1  | 119.422(18) |
| C35 | C30 | C2  | 120.1(4)  | C8_1  | N3_1  | C12_1 | 118.527(19) |
| C30 | C31 | C32 | 120.0     | N3_1  | C12_1 | C50_1 | 104.5(7)    |
| C33 | C32 | C31 | 120.0     | C55_1 | C50_1 | C12_1 | 119.0(6)    |
| C32 | C33 | C36 | 111.9(12) | C51_1 | C50_1 | C12_1 | 119.3(7)    |
| C34 | C33 | C32 | 120.0     | C51_1 | C50_1 | C55_1 | 117.6(9)    |
| C34 | C33 | C36 | 128.1(12) | C54_1 | C55_1 | C50_1 | 119.7(7)    |
| C33 | C34 | C35 | 120.0     | C55_1 | C54_1 | C53_1 | 119.7(8)    |
| C34 | C35 | C30 | 120.0     | C54_1 | C53_1 | C56_1 | 120.8(6)    |
| C33 | C36 | In2 | 167.1(11) | C52_1 | C53_1 | C54_1 | 118.0(6)    |
| O3  | C36 | In2 | 63.3(10)  | C52_1 | C53_1 | C56_1 | 121.1(6)    |
| O3  | C36 | C33 | 125.7(15) | C53_1 | C52_1 | C51_1 | 119.7(7)    |
| O3  | C36 | O4  | 114.2(10) | C52_1 | C51_1 | C50_1 | 119.5(8)    |
| O4  | C36 | In2 | 64.7(11)  | C53_1 | C56_1 | In1   | 179.2(9)    |
| O4  | C36 | C33 | 113.6(12) | O8_1  | C56_1 | In1   | 59.0(6)     |
| C41 | C40 | C45 | 120.0     | O8_1  | C56_1 | C53_1 | 120.2(9)    |
| C41 | C40 | C11 | 120.1(4)  | O7_1  | C56_1 | In1   | 59.3(6)     |
| C45 | C40 | C11 | 119.9(4)  | O7_1  | C56_1 | C53_1 | 121.6(10)   |
| C40 | C41 | C42 | 120.0     | O7_1  | C56_1 | O8_1  | 117.0(12)   |
| C43 | C42 | C41 | 120.0     | C56_1 | O8_1  | In1   | 92.6(8)     |
| C42 | C43 | C44 | 120.0     | C56_1 | O7_1  | In1   | 92.7(8)     |

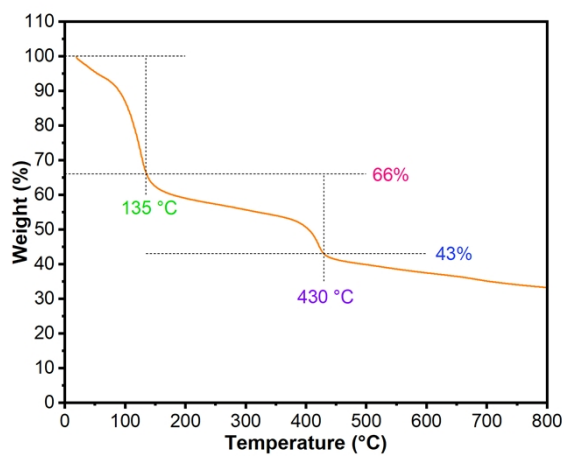

Figure S4 TG curve of In-PQTB.

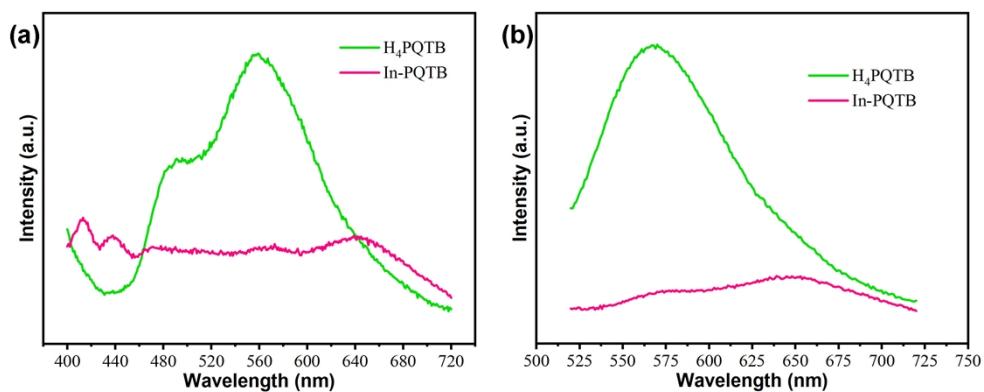

Figure S5 Solid-state fluorescence spectra of In-PQTB excited at (a) 380 nm and (b) 490 nm, respectively.

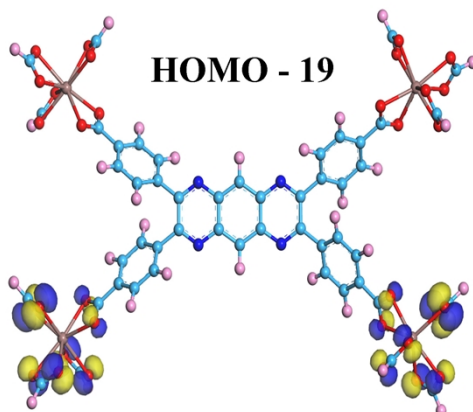

Figure S6 HOMO - 19 of In-PQTB.

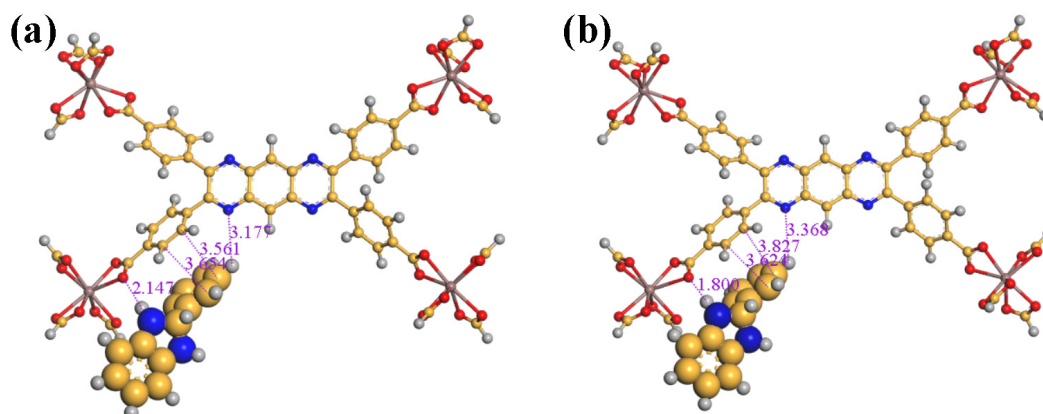

Figure S7 Distance among In-PQTB and (a) intermediate (IV) and (b) intermediate (V), respectively.

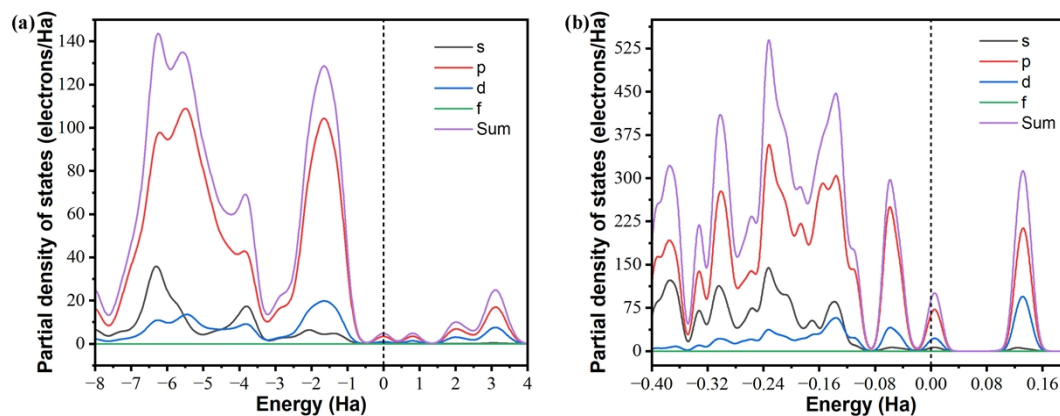

Figure S8 Partial density of states of In-PQTB interacting with (a) intermediate (IV) and (b) intermediate (V), respectively.

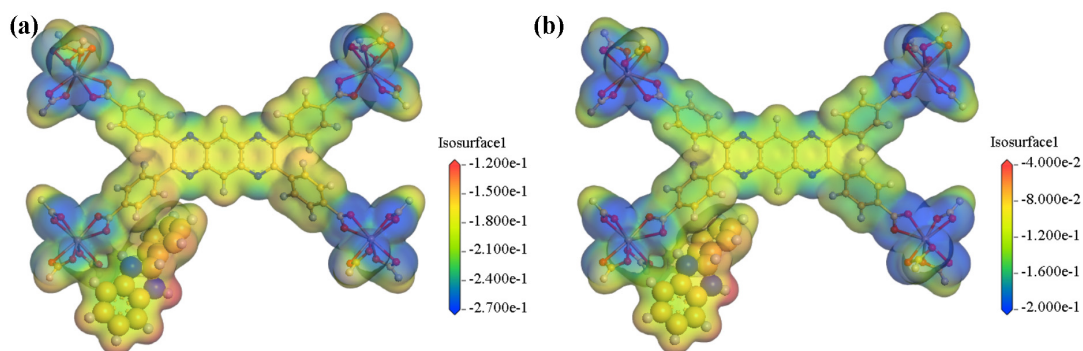

Figure S9 Images of electrostatic potential iso-surface of electron density of In-PQTB interacting with (a) intermediate (IV) and (b) intermediate (V), respectively.

## Investigation of reaction mechanism

To verify the proposed mechanism, control experiments were carried out. For Reaction 2, with the addition of triethanolamine (TEOA) and *p*-benzoquinone (BQ) (2 equiv.), the yields for **5a** decrease to 44% and 17%, respectively, suggesting that superoxide radicals and holes have participated in the reaction process. By-products and intermediates for Reaction 2 were detected with NMR and mass spectrum. According to previous reports<sup>5-10</sup>, characteristic peaks of by-product **B** can be observed (Figure S10 and S11).

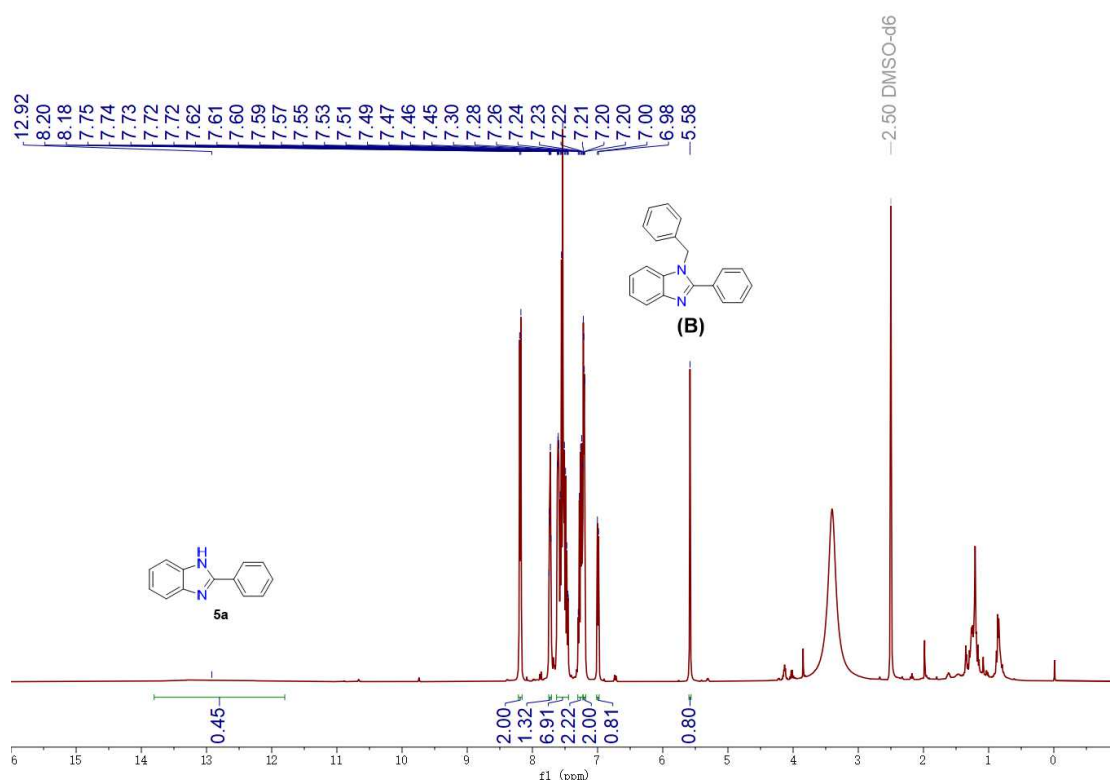

Figure S10 <sup>1</sup>H NMR spectrum of the mixture of **5a** and **B**.

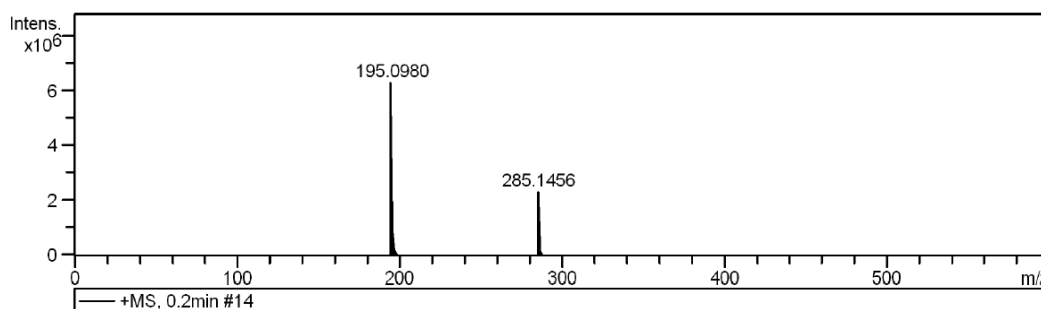

Figure S11 Mass spectrum of the mixture of **5a** and **B**. (Left: [**5a**+H<sup>+</sup>]; Right: [**B**+H<sup>+</sup>])

## Evaluation of catalytic performance

The cycling stability of In-PQTB was checked by five consecutive catalytic cycles. As is depicted in Figure S12, the catalytic activity of In-PQTB slightly deteriorates after five runs, which guarantees its practical applications. Moreover, the catalytic activity of In-PQTB has been compared with those of other catalysts in terms of yields of **5a** (Table S4), indicating its superiority. The much higher yield of In-PQTB than that of the mixture of InCl<sub>3</sub> and H<sub>4</sub>PQTB highlights the effect of coordination. The sequentially increasing yields of Zn-PQTB, Cd-PQTB and In-PQTB confirm the significance of MLCT process, energy level matching and orbital hybridization between metal nodes and ligands.

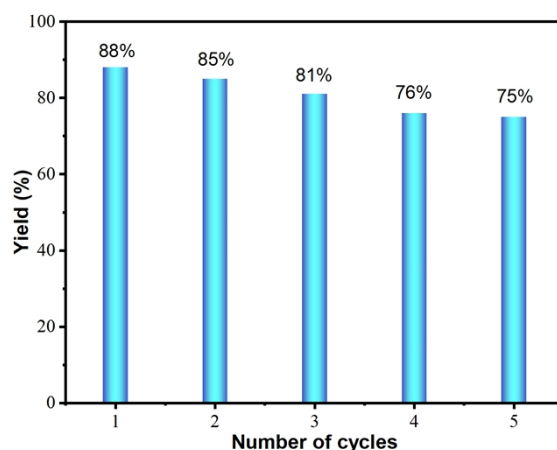

Figure S12 Cycling stability of In-PQTB.

Table S4. Comparison of photocatalytic performance of In-PQTB and other catalysts. (in terms of Reaction 2, yield of **5a**)

| Catalysts                               | E <sub>g</sub> | Dosage        | Light Source   | Yield |
|-----------------------------------------|----------------|---------------|----------------|-------|
| In-PQTB                                 | 1.474 eV       | 2.5 mol%      | 10 W white LED | 88%   |
| InCl <sub>3</sub> + H <sub>4</sub> PQTB | —              | Both 2.5 mol% | 10 W white LED | 28%   |
| Zn-PQTB                                 | 2.93 eV        | 2.5 mol%      | 10 W 365 nm    | 31%   |
| Cd-PQTB                                 | 2.38 eV        | 2.5 mol%      | 10 W white LED | 53%   |
| Rhodamine B <sup>11</sup>               | —              | 2 mol%        | 10 W blue LED  | 49%   |
| Cu-MOF <sup>12</sup>                    | 2.01 eV        | 4 mol%        | 10 W 365 nm    | 25%   |
| In-MOF <sup>13</sup>                    | 2.44 eV        | 4 mol%        | 10 W 365 nm    | 45%   |

## Characterization of products

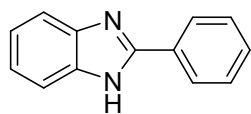

2-phenyl-1*H*-benzo[*d*]imidazole (**5a**)

<sup>1</sup>H NMR (400 MHz, DMSO-*d*<sub>6</sub>) δ 12.94 (s, 1H), 8.32 – 8.10 (m, 2H), 7.70 – 7.45 (m, 5H), 7.21 (dd, *J* = 6.1, 3.2 Hz, 2H).

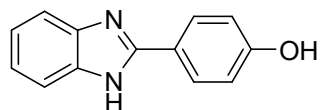

4-(1*H*-benzo[*d*]imidazol-2-yl)phenol (**5b**)

<sup>1</sup>H NMR (400 MHz, DMSO-*d*<sub>6</sub>) δ 12.65 (s, 1H), 9.96 (s, 1H), 8.00 (d, *J* = 8.3 Hz, 2H), 7.60 – 7.45 (m, 2H), 7.15 (dd, *J* = 6.1, 3.2 Hz, 2H), 6.91 (d, *J* = 8.3 Hz, 2H).

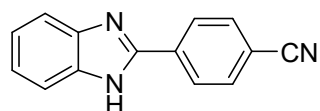

4-(1*H*-benzo[*d*]imidazol-2-yl)benzonitrile (**5c**)

<sup>1</sup>H NMR (400 MHz, DMSO-*d*<sub>6</sub>) δ 13.19 (s, 1H), 8.34 (d, *J* = 8.2 Hz, 2H), 7.99 (d, *J* = 8.3 Hz, 2H), 7.65 (s, 2H), 7.25 (dd, *J* = 6.1, 3.1 Hz, 2H).

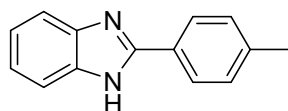

2-(*p*-tolyl)-1*H*-benzo[*d*]imidazole (**5d**)

<sup>1</sup>H NMR (400 MHz, DMSO-*d*<sub>6</sub>) δ 12.84 (s, 1H), 8.08 (d, *J* = 8.0 Hz, 2H), 7.59 (dd, *J* = 6.0, 3.2 Hz, 2H), 7.35 (d, *J* = 7.9 Hz, 2H), 7.19 (dd, *J* = 6.0, 3.2 Hz, 2H), 2.37 (s, 3H).

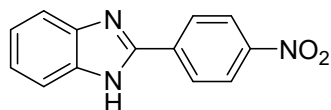

2-(4-nitrophenyl)-1*H*-benzo[*d*]imidazole (**5e**)

<sup>1</sup>H NMR (400 MHz, DMSO-*d*<sub>6</sub>) δ 13.32 (s, 1H), 8.42 (s, 4H), 7.68 (d, *J* = 8.0 Hz, 2H), 7.27 (dd, *J* = 6.1, 3.1 Hz, 2H).

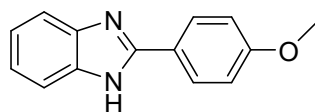

2-(4-methoxyphenyl)-1*H*-benzo[*d*]imidazole (**5f**)



$^1\text{H}$  NMR (400 MHz,  $\text{DMSO-}d_6$ )  $\delta$  8.12 (d,  $J = 8.5$  Hz, 2H), 7.56 (s, 2H), 7.21 – 7.07 (m, 4H), 3.83 (s, 3H).

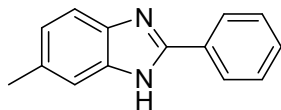

6-methyl-2-phenyl-1*H*-benzo[*d*]imidazole (**5g**)

$^1\text{H}$  NMR (400 MHz,  $\text{DMSO-}d_6$ )  $\delta$  12.76 (s, 1H), 8.15 (d,  $J = 7.6$  Hz, 2H), 7.60 – 7.42 (m, 4H), 7.37 (s, 1H), 7.02 (d,  $J = 8.2$  Hz, 1H), 2.43 (s, 3H).

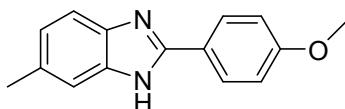

2-(4-methoxyphenyl)-6-methyl-1*H*-benzo[*d*]imidazole (**5h**)

$^1\text{H}$  NMR (400 MHz,  $\text{DMSO-}d_6$ )  $\delta$  8.11 (d,  $J = 8.8$  Hz, 2H), 7.44 (d,  $J = 8.1$  Hz, 1H), 7.35 (s, 1H), 7.09 (d,  $J = 8.8$  Hz, 2H), 6.99 (d,  $J = 8.1$  Hz, 1H), 3.82 (s, 3H), 2.41 (s, 3H).

## References

1. Y. Chen, A.-g. Liu, P.-d. Liu, Z.-y. Zhang, F. Yu, W. Qi and B. Li, *Inorg. Chem.*, 2022, **61**, 16009-16019.
2. S. Pizarro, M. Gallardo, C. Leyton, E. Castro, F. Gajardo and A. Delgadillo, *Spectrochim Acta A Mol Biomol Spectrosc*, 2015, **146**, 61-65.
3. I. Hisaki, N. Q. Emilya Affendy and N. Tohnai, *CrystEngComm*, 2017, **19**, 4892-4898.
4. A. G. Liu, X. Y. Meng, Y. Chen, Z. T. Chen, P. D. Liu and B. Li, *ACS Appl. Mater. Interfaces*, 2023, **16**, 669-683.
5. X. Huang, Y. He, Z. Chen and C. Hu, *Chin. J. Chem.* . 2009, **27**, 1526-1530.
6. H. Sharma, N. Kaur, N. Singh and D. O. Jang, *Green Chem.*, 2015, **17**, 4263-4270.
7. P. Ghosh and A. Mandal, *Tetrahedron Letters*, 2012, **53**, 6483-6488.
8. E. S. paghaleh, S. M. Vahdat and M. Hatami, *J. Nanostruct.*, 2021, **11**, 286-296.
9. S. Azadi, A. R. Sardarian and M. Esmailpour, *Monatsh. Chem.*, 2023, **154**, 887-903.
10. R. Chebolu, D. N. Kommi, D. Kumar, N. Bollineni and A. K. Chakraborti, *J. Org. Chem.*, 2012, **77**, 10158-10167.
11. Z. Li, H. Song, R. Guo, M. Zuo, C. Hou, S. Sun, X. He, Z. Sun and W. Chu, *Green Chem.*, 2019, **21**, 3602-3605.
12. X. Chen, Z.-t. Chen, F. Zhu, Y. Chen, A.-g. Liu, X. Yin, Z.-k. Chen and B. Li, *CrystEngComm*, 2024, **26**, 4489-4497.
13. Y. Chen, X. Yin, Z. K. Chen, P. M. Wang and B. Li, *Inorg. Chem.*, 2023, **62**, 10626-10634.

# <sup>1</sup>H NMR spectra of products

## 2a-<sup>1</sup>H NMR (400 MHz, CDCl<sub>3</sub>)

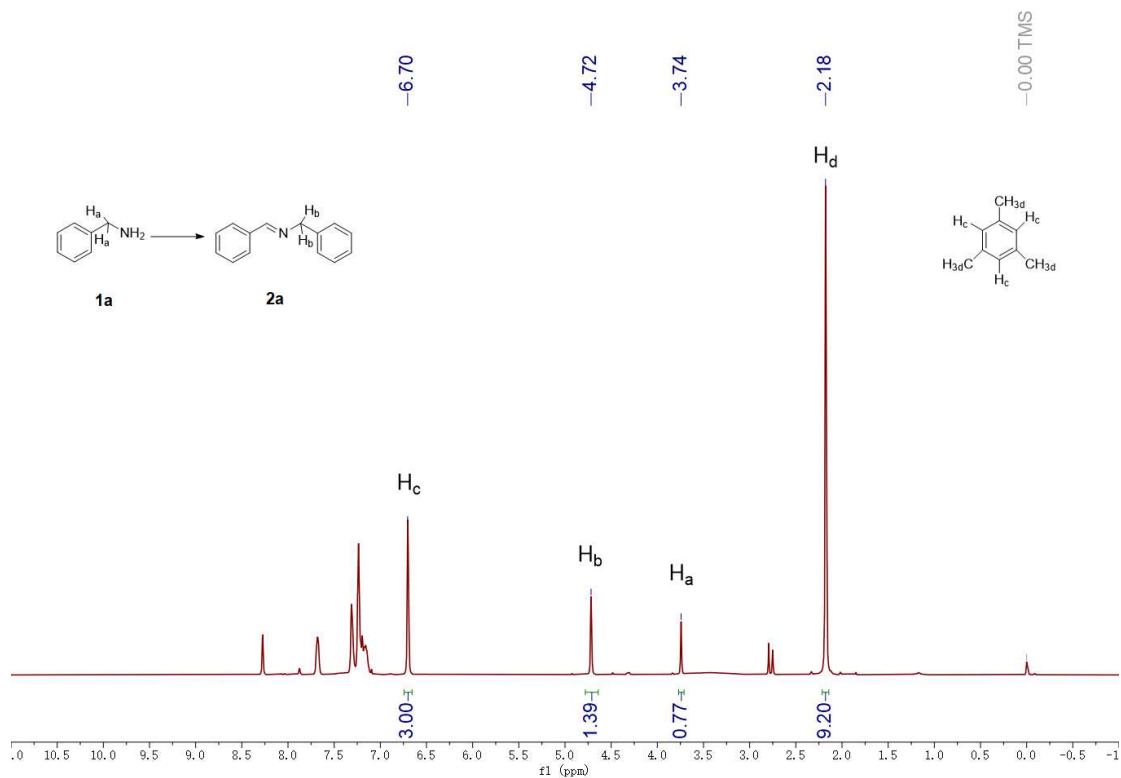

## 2b-<sup>1</sup>H NMR (400 MHz, CDCl<sub>3</sub>)

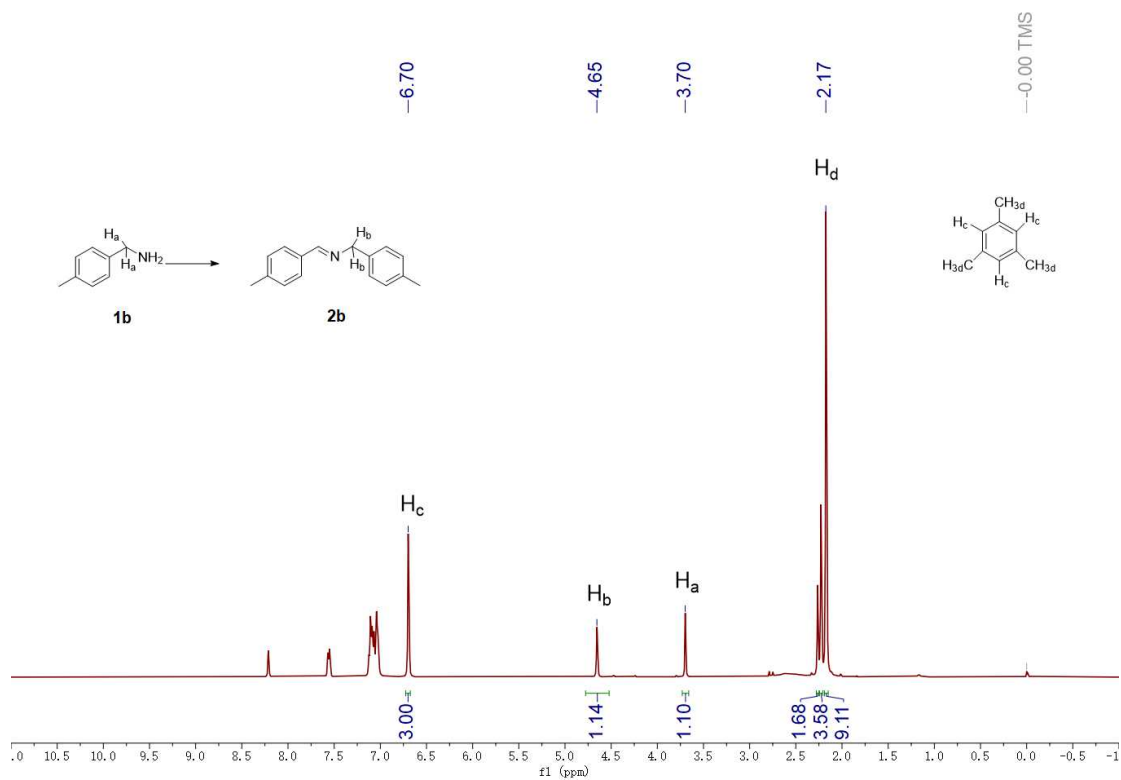

### 2c-<sup>1</sup>H NMR (400 MHz, CDCl<sub>3</sub>)

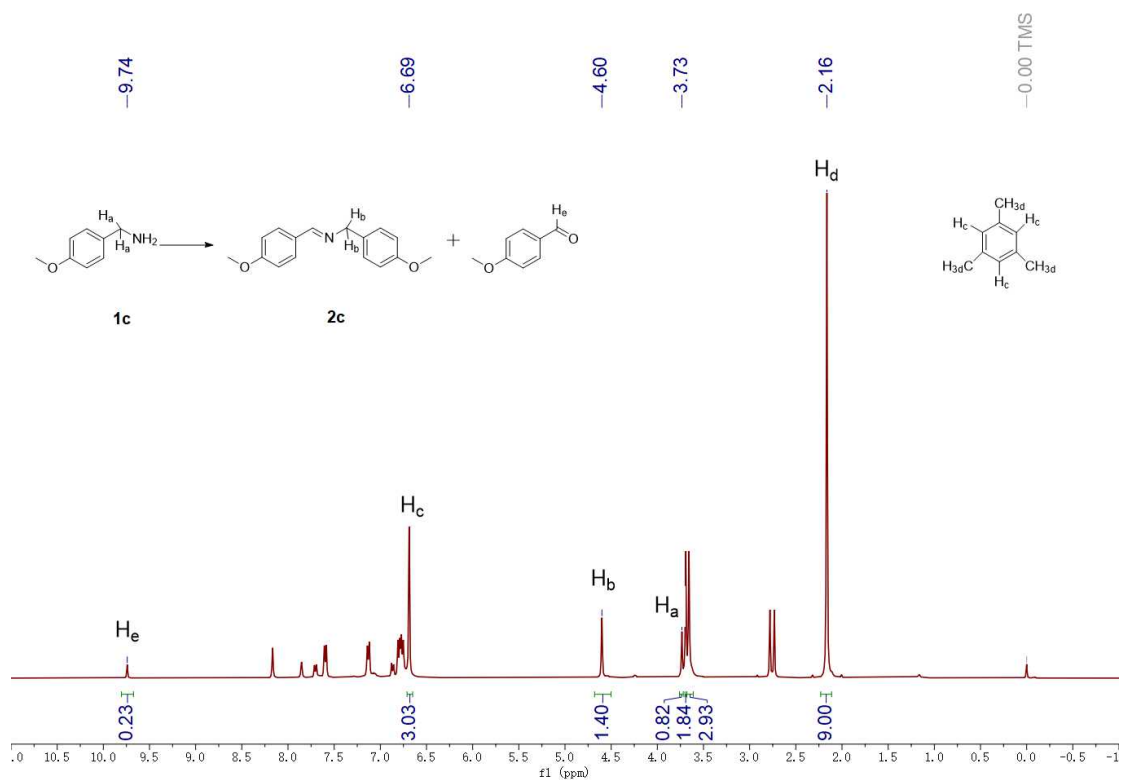

### 2d-<sup>1</sup>H NMR (400 MHz, CDCl<sub>3</sub>)

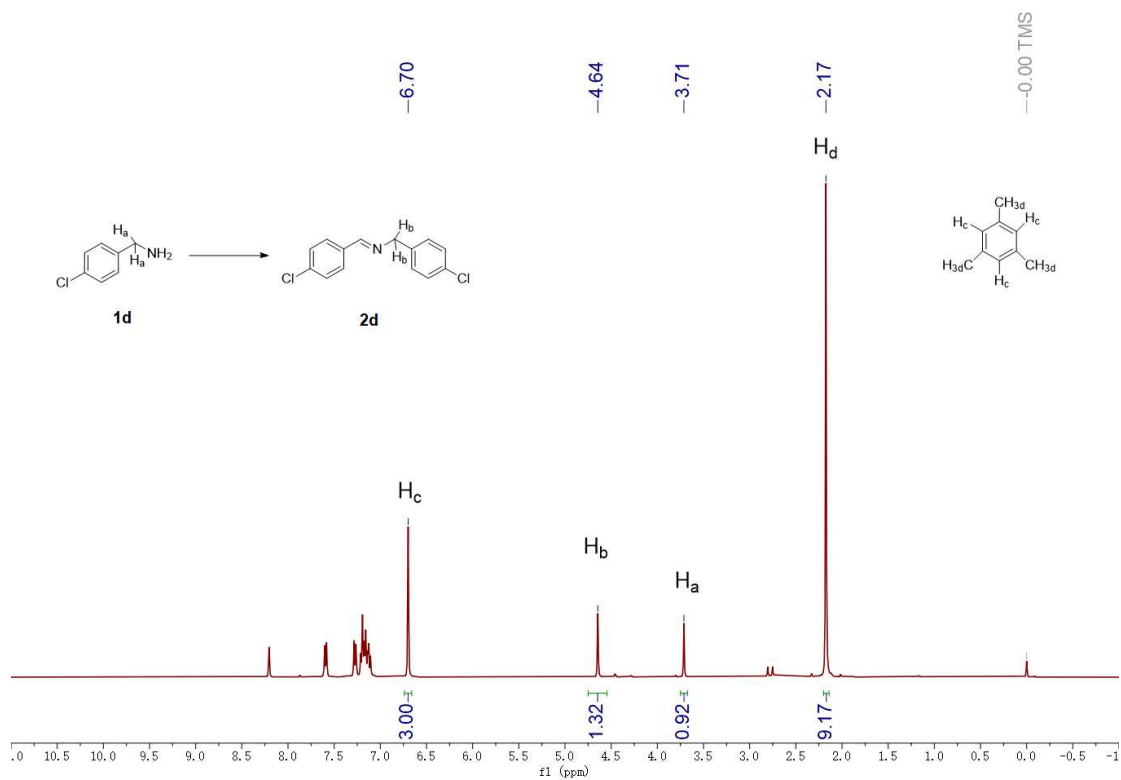

## 2e-<sup>1</sup>H NMR (400 MHz, CDCl<sub>3</sub>)

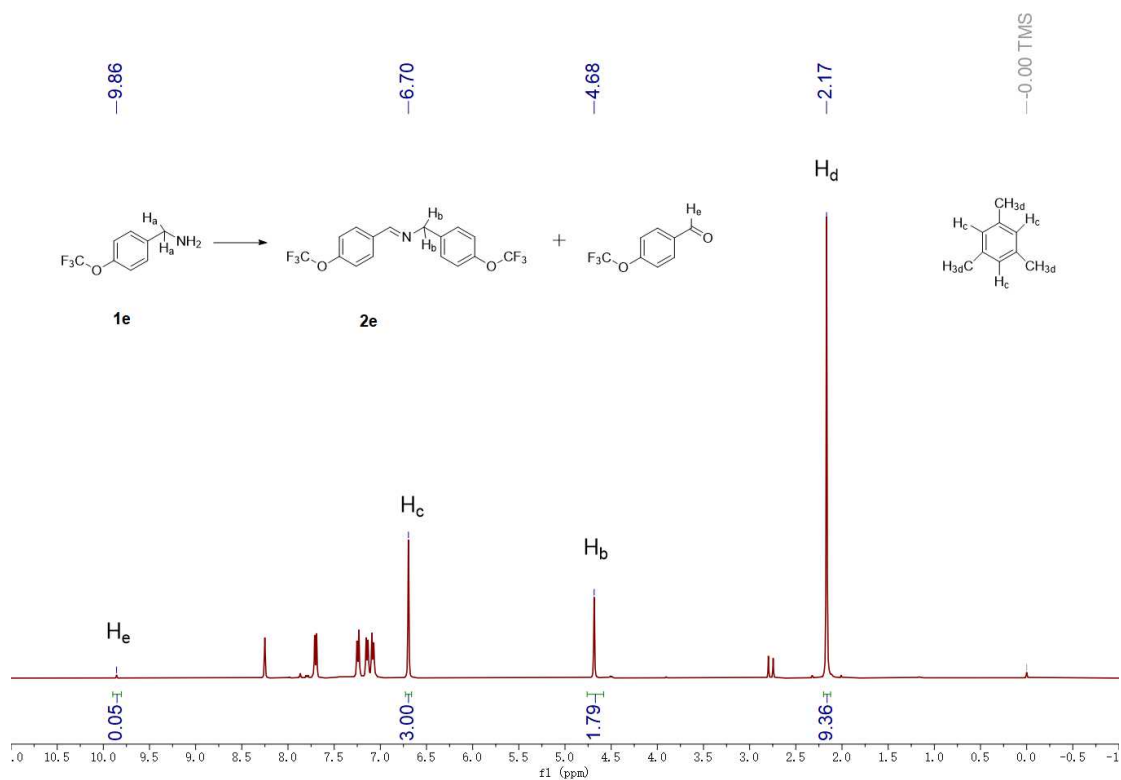

## 2f-<sup>1</sup>H NMR (400 MHz, CDCl<sub>3</sub>)

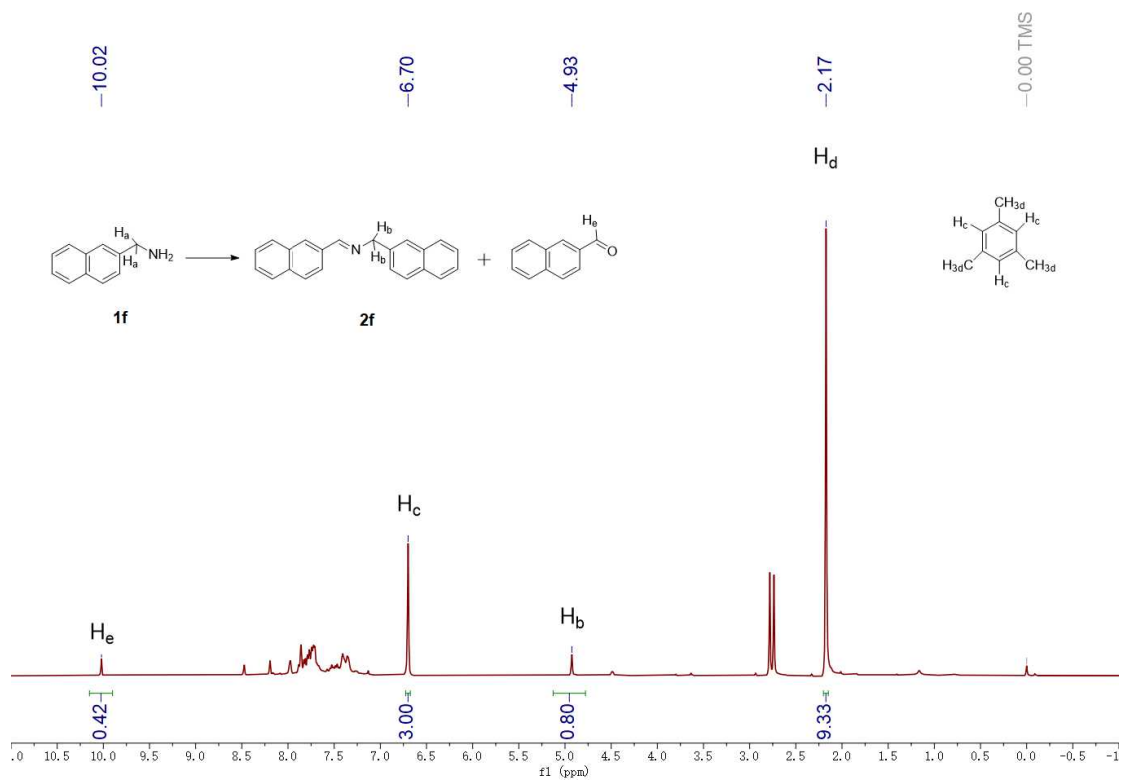

### 2g-<sup>1</sup>H NMR (400 MHz, CDCl<sub>3</sub>)

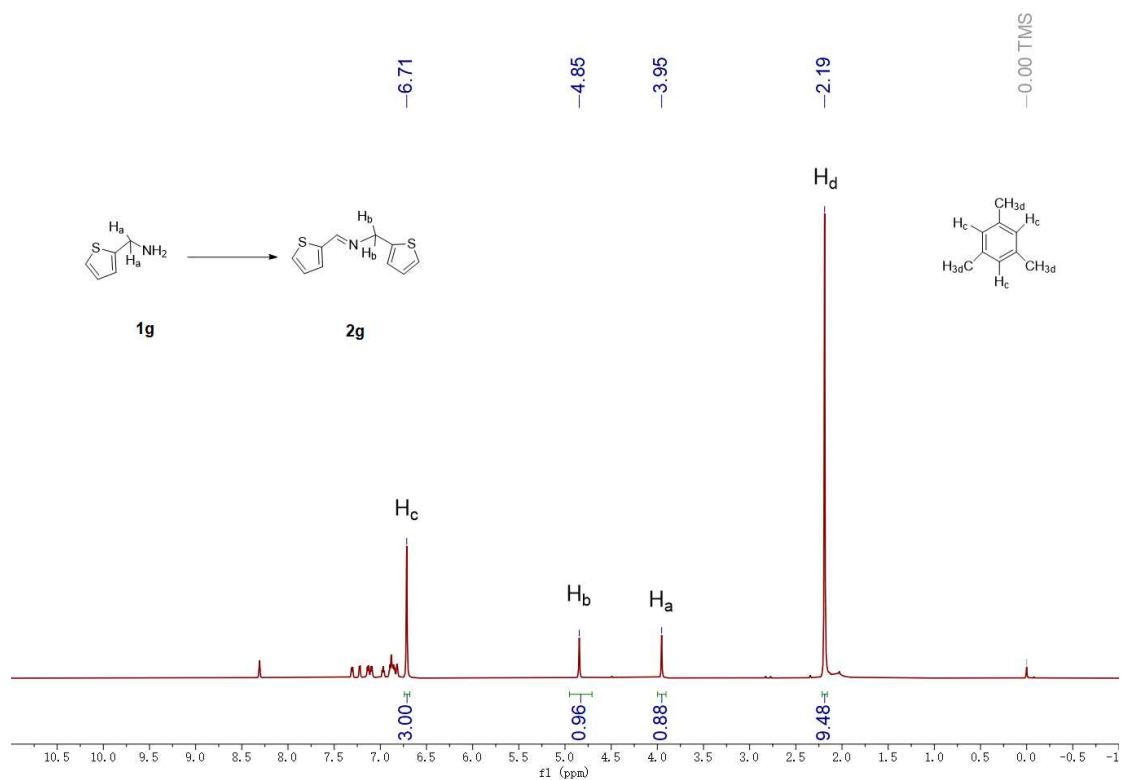

### 5a-<sup>1</sup>H NMR (400 MHz, DMSO-d<sub>6</sub>)

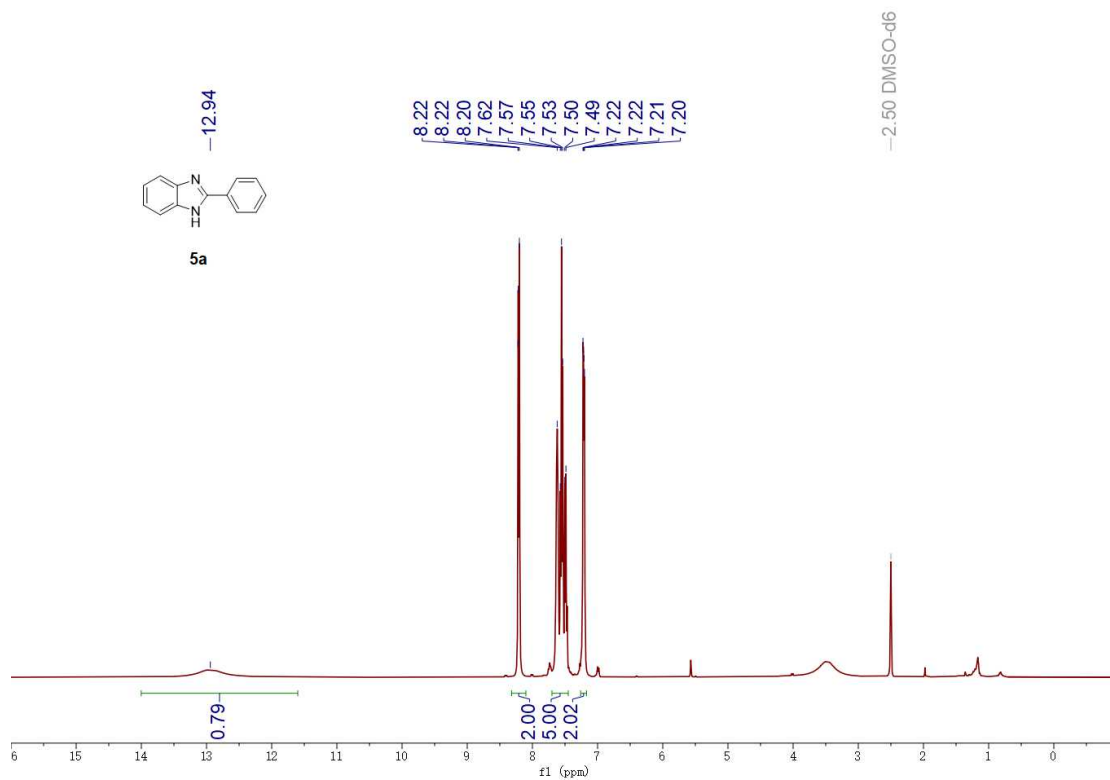

### 5b-<sup>1</sup>H NMR (400 MHz, DMSO-*d*<sub>6</sub>)

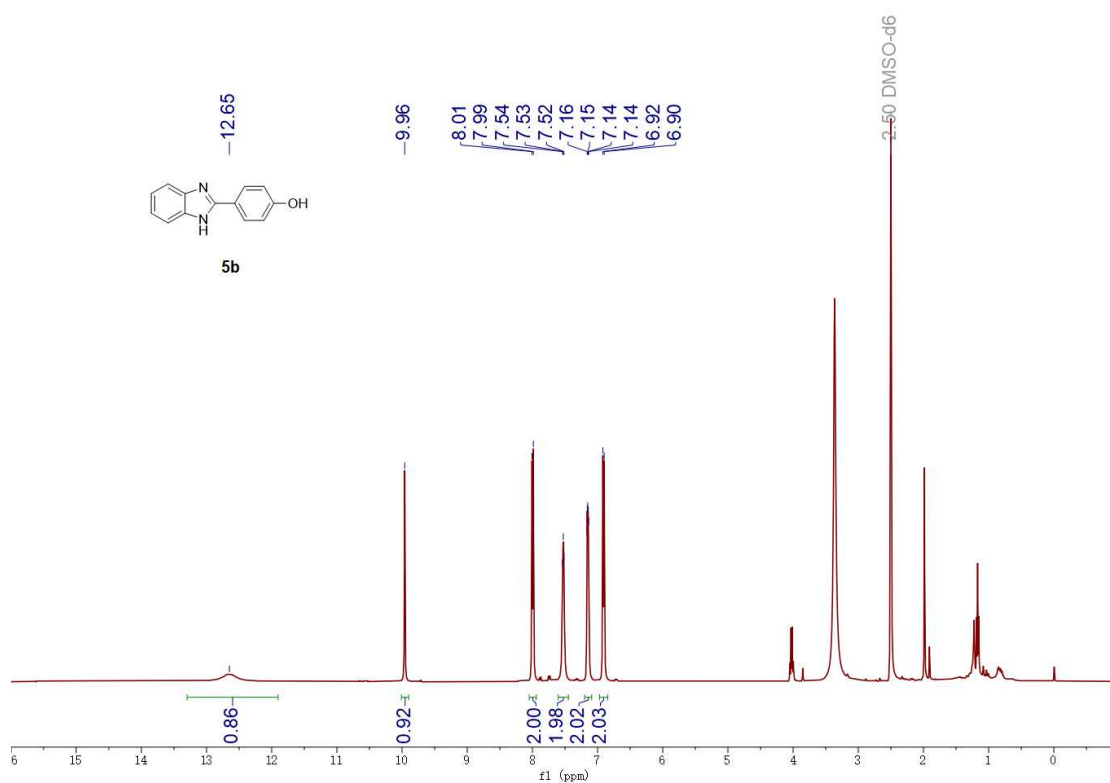

### 5c-<sup>1</sup>H NMR (400 MHz, DMSO-*d*<sub>6</sub>)

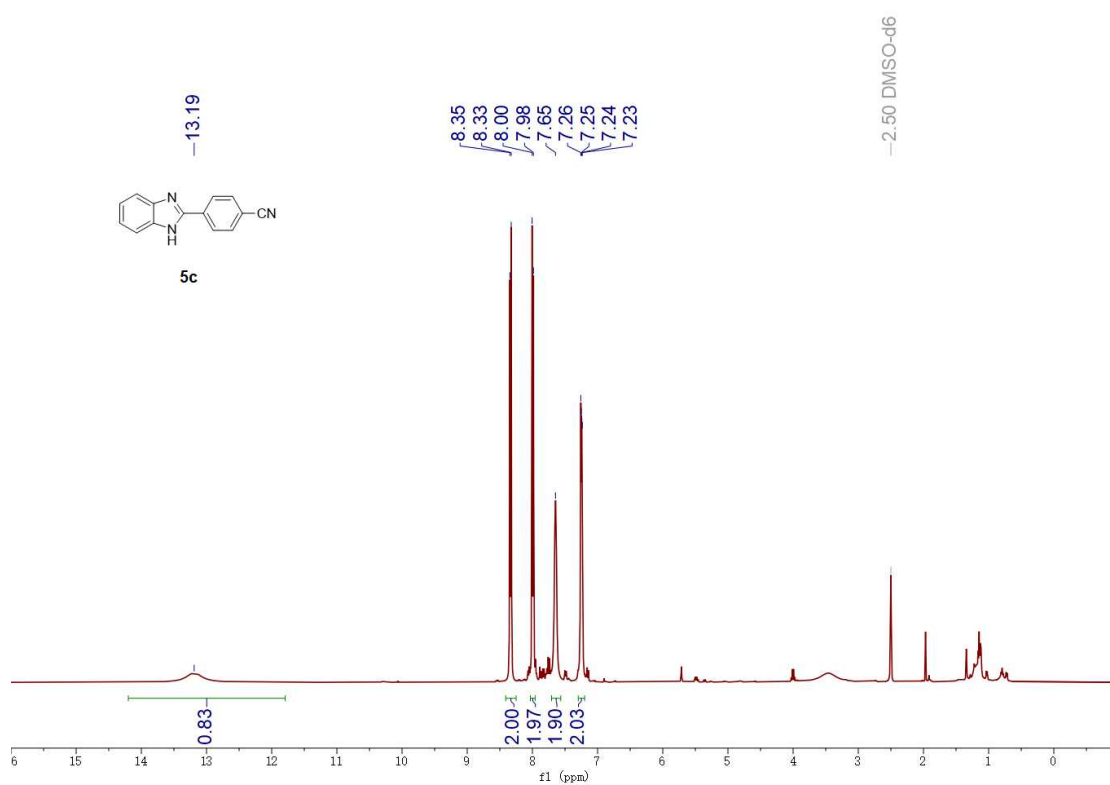

### 5d-<sup>1</sup>H NMR (400 MHz, DMSO-*d*<sub>6</sub>)

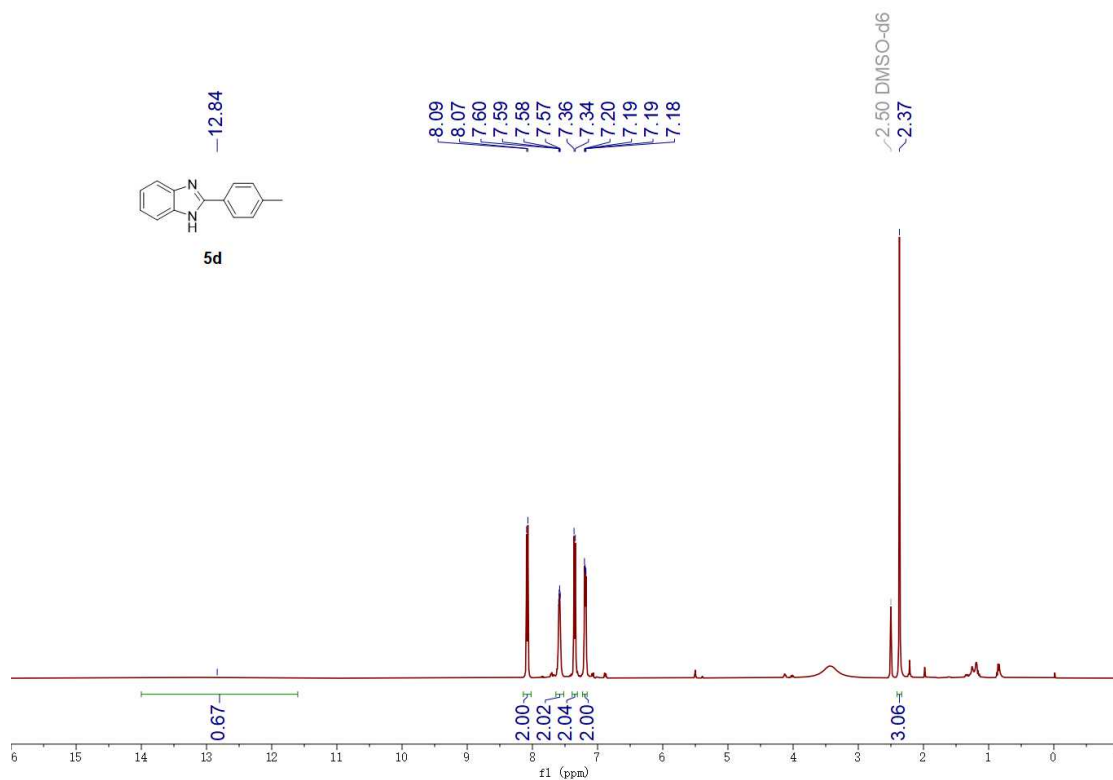

### 5e-<sup>1</sup>H NMR (400 MHz, DMSO-*d*<sub>6</sub>)

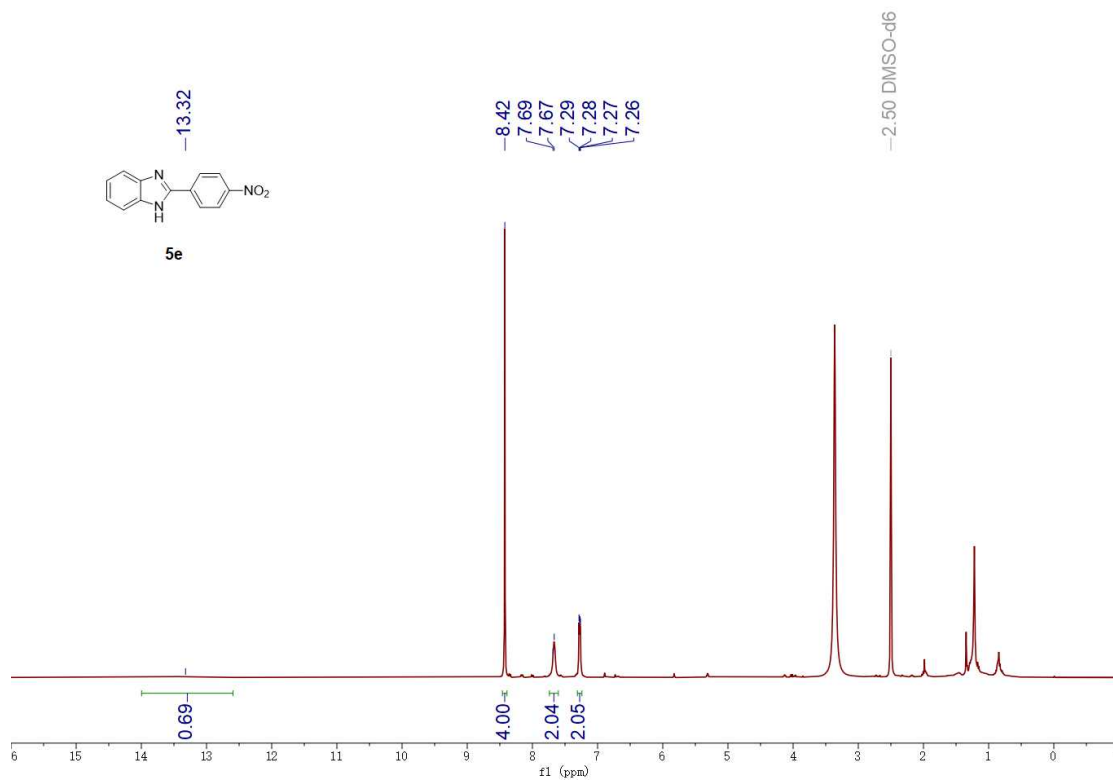



### 5f-<sup>1</sup>H NMR (400 MHz, DMSO-*d*<sub>6</sub>)

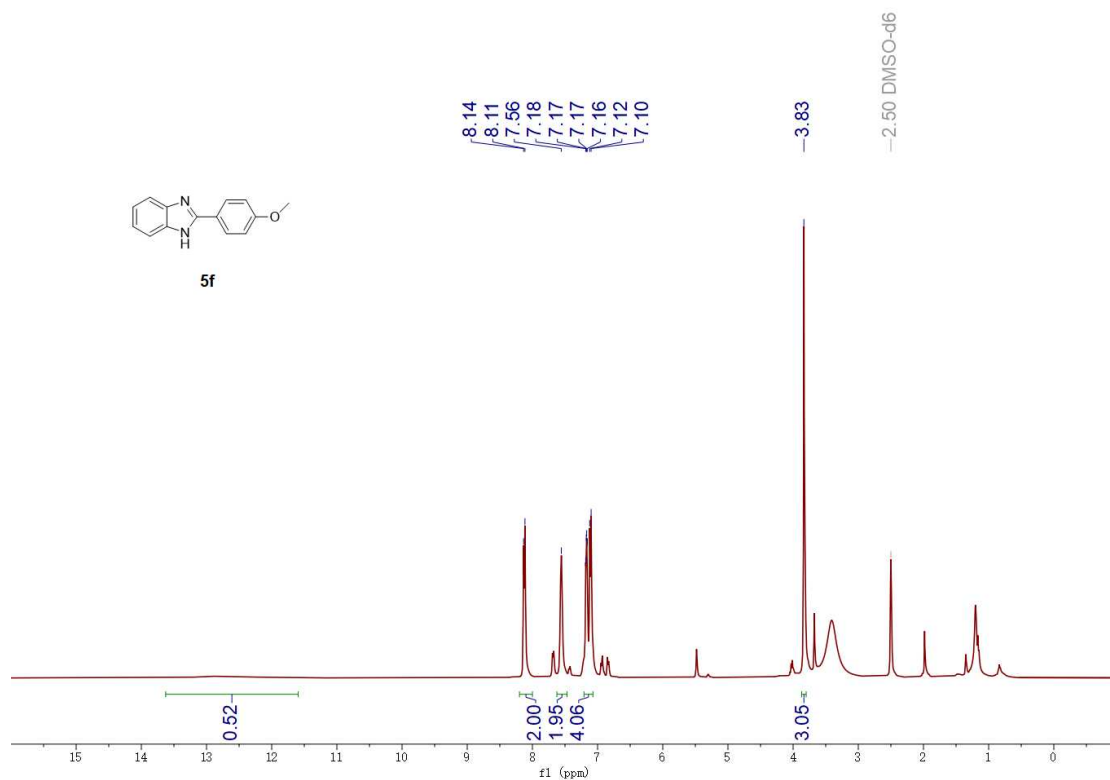

### 5g-<sup>1</sup>H NMR (400 MHz, DMSO-*d*<sub>6</sub>)

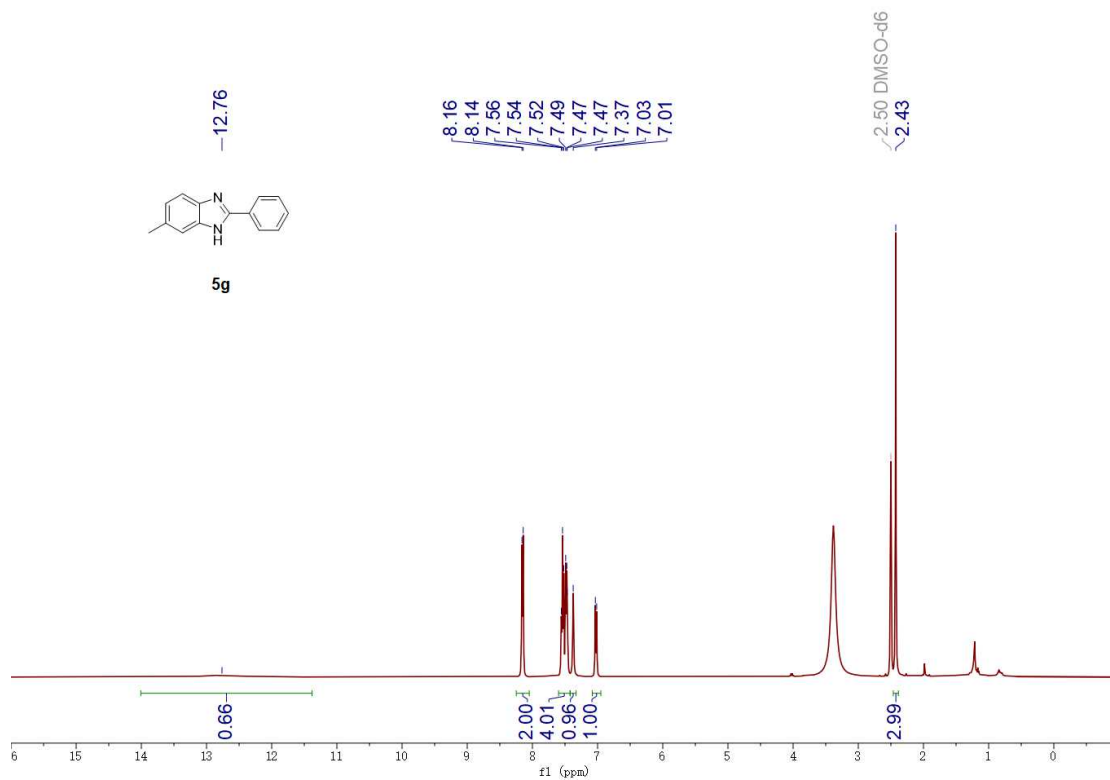

# 5h-<sup>1</sup>H NMR (400 MHz, DMSO-d<sub>6</sub>)

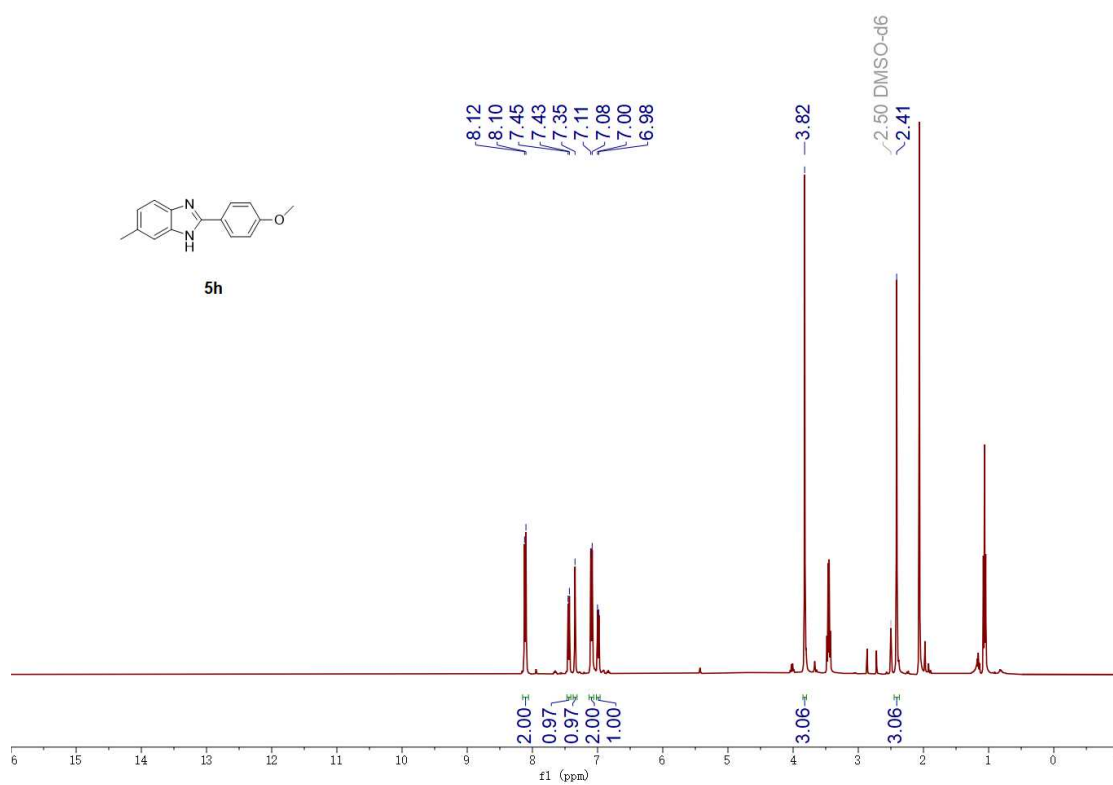

Supplement: d4ta06282e1.pdf [file d4ta06282e1.pdf]
